# Supplementary material for: Exclusionary School Discipline and School Achievement for Middle and High School Students, by Race and Ethnicity
Source: PubMed Central journal article supplement (PMC10589805; doi:10.1001/jamanetworkopen.2023.38989), 2023-10-20
Supplement: jamanetwopen-e2338989-s001.pdf [file jamanetwopen-e2338989-s001.pdf]

## Supplementary Online Content

Cribb Fabersunne C, Lee SY, McBride D, et al. Exclusionary school discipline and school achievement for middle and high school students, by race and ethnicity. *JAMA Netw Open*. 2023;6(10):e2338989. doi:10.1001/jamanetworkopen.2023.38989

**eTable 1.** Baseline Characteristics of Students in Middle and High School Between 2014-2017, Analytic Sample Compared to Excluded Sample

**eTable 2.** Bivariate and Multivariable Mixed Linear Models of Select Baseline Characteristics and GPA Across Three Years, Using Year of First Suspension

This supplementary material has been provided by the authors to give readers additional information about their work.

eTable 1. Baseline characteristics of students in middle and high school between 2014-2017, analytic sample compared to excluded sample

| Variable                                                                                                    | Frequency                 |                          | p-value |
|-------------------------------------------------------------------------------------------------------------|---------------------------|--------------------------|---------|
|                                                                                                             | N (%) or median (IQR)     |                          |         |
|                                                                                                             | Analytic Sample (N=16849) | Excluded Sample (N=2191) |         |
| <b>Grade level at school year 2014-2015</b>                                                                 |                           |                          | <0.001  |
| 6                                                                                                           | 3373 (20.0)               | 267 (12.2)               |         |
| 7                                                                                                           | 3104 (18.4)               | 468 (21.4)               |         |
| 8                                                                                                           | 3121 (18.5)               | 502 (22.9)               |         |
| 9                                                                                                           | 3709 (22.0)               | 431 (19.7)               |         |
| 10                                                                                                          | 3542 (21.0)               | 523 (23.9)               |         |
| <b>Self-reported gender</b>                                                                                 |                           |                          | 0.215   |
| Female                                                                                                      | 8093 (48.0)               | 1021 (46.6)              |         |
| Male                                                                                                        | 8756 (52.0)               | 1170 (53.4)              |         |
| <b>Self-reported race/ethnicity</b>                                                                         |                           |                          | p<0.001 |
| African American or Black                                                                                   | 1270 (7.5)                | 350 (16.0)               |         |
| American Indian or Alaskan Native                                                                           | 75 (0.4)                  | 19 (0.9)                 |         |
| East Asian (Korean, Japanese, Chinese)                                                                      | 6165 (36.6)               | 200 (9.1)                |         |
| Hispanic or Latine(a/o)                                                                                     | 4311 (25.6)               | 745 (34.0)               |         |
| Other Asian                                                                                                 | 69 (0.4)                  | 5 (0.2)                  |         |
| Pacific Islander (Samoan, Guamanian, Phillipine (a/o), Native Hawaiian, Laotian and other Pacific Islander) | 1199 (7.1)                | 134 (6.1)                |         |
| South Asian / Asian Indian                                                                                  | 416 (2.5)                 | 45 (2.1)                 |         |
| Southeast Asian (Cambodian, Hmong, Vietnamese)                                                              | 645 (3.8)                 | 42 (1.9)                 |         |
| Two or More Races                                                                                           | 356 (2.1)                 | 2 (0.1)                  |         |
| White (Non Hispanic)                                                                                        | 1680 (10.0)               | 329 (15.0)               |         |
| Unknown                                                                                                     | 663 (3.9)                 | 320 (14.6)               |         |
| <b>Highest maternal education noted at baseline</b>                                                         |                           |                          | <0.001  |
| Graduate school/postgraduate training                                                                       | 712 ( 4.2)                | 148 ( 6.8)               |         |
| College graduate                                                                                            | 1934 (11.5)               | 251 (11.5)               |         |
| Some college (includes AA degree)                                                                           | 1637 ( 9.7)               | 226 (10.3)               |         |
| High school graduate                                                                                        | 4172 (24.8)               | 307 (14.0)               |         |
| Not a high school graduate                                                                                  | 1946 (11.5)               | 150 ( 6.8)               |         |
| Decline to state                                                                                            | 6443 (38.2)               | 1107 (50.5)              |         |
| missing                                                                                                     | 5 ( 0.0)                  | 0 (0.0)                  |         |

|                                                                              |               |               |        |
|------------------------------------------------------------------------------|---------------|---------------|--------|
| <b>Active IEP, indicating special education</b>                              |               |               | 0.027  |
| No                                                                           | 14749 (87.5)  | 1882 (85.9)   |        |
| Yes                                                                          | 2100 (12.5)   | 309 (14.1)    |        |
| <b>Meeting English Language Arts (ELA) standards*</b>                        |               |               | <0.001 |
| Yes meeting standards                                                        | 2431 (14.4)   | 215 (9.8)     |        |
| Not meeting standards                                                        | 6648 (39.5)   | 674 (30.8)    |        |
| Missing                                                                      | 7770 (46.1)   | 1302 (59.4)   |        |
| <b>Meeting Math standards*</b>                                               |               |               | <0.001 |
| Yes meeting standards                                                        | 2860 (17.0)   | 319 (14.6)    |        |
| Not meeting standards                                                        | 6340 (37.6)   | 605 (27.6)    |        |
| Missing                                                                      | 7649 (45.4)   | 1267 (57.8)   |        |
| <b>Proportion of students “Citizenship Scores” that are excellent*</b>       |               |               | <0.001 |
| Proportion of students with excellent scores in $\geq 75\%$ of their classes | 766 (4.5)     | 63 ( 2.9)     |        |
| Proportion of students with excellent scores in $< 75\%$ of their classes    | 15938 (94.6)  | 1777 (81.1)   |        |
| <i>Missing</i>                                                               | 145 (0.9)     | 351 (16.0)    |        |
| <b>Experiences of exclusionary school discipline (ESD)</b>                   |               |               |        |
| <b>School year of first experience of ESD</b>                                |               |               | 0.213  |
| no ESD events                                                                | 13236 (78.6)  | 1751 (79.9)   |        |
| 2014-2015                                                                    | 1783 (10.6)   | 360 (16.4)    |        |
| 2015-2016                                                                    | 1082 (6.4)    | 79 (3.6)      |        |
| 2016-2017                                                                    | 748 (4.4)     | 1 (0.1)       |        |
| <b>Any suspension over study period</b>                                      | 1041 (6.2)    | 127 (5.8)     | 0.513  |
| <b>Median number of suspensions, among those with a suspension</b>           | 1.0 (IQR=1.0) | 1.0 (IQR=1.0) |        |
| <b>Total number of suspensions</b>                                           |               |               |        |
| 0                                                                            | 15808 (93.8)  | 2085 (95.2)   | <0.001 |
| 1                                                                            | 646 (3.8)     | 77 ( 3.5)     |        |
| >1                                                                           | 395 (2.3)     | 29 ( 1.3)     |        |
| <b>Any referral over study period</b>                                        | 3444 (20.4)   | 389 (17.8)    | 0.003  |
| <b>Median number of referrals, among those with a referral</b>               | 2.0 (IQR = 5) | 2.0 (IQR = 4) |        |
| <b>Total number of referrals</b>                                             |               |               |        |
| 0                                                                            | 13405 (79.6)  | 1882 (85.9)   | <0.001 |
| 1                                                                            | 1324 (7.9)    | 157 ( 7.2)    |        |
| >1                                                                           | 2120 (12.6)   | 152 ( 6.9)    |        |

|                                                                   |               |               |        |
|-------------------------------------------------------------------|---------------|---------------|--------|
| <b>Any ESD (suspension or referral), over the study period</b>    | 3613 (21.4)   | 440 (20.1)    | 0.151  |
| <b>Median number of ESD events, among those with an ESD event</b> | 2.0 (IQR = 5) | 2.0 (IQR = 4) |        |
| <b>Total number of ESD</b>                                        |               |               | <0.001 |
| 0                                                                 | 13236 (78.6)  | 1751 (79.9)   |        |
| 1                                                                 | 1353 (8.0)    | 205 ( 9.4)    |        |
| >1                                                                | 2260 (13.4)   | 235 (10.7)    |        |

\*Citizenship, Meeting ELA and Math standards are included in Table 1 for descriptive information; these are not co-variates of interest and thus are not included in our multivariable models

**eTable 2. Bivariate and multivariable mixed linear models of select baseline characteristics and GPA across three years, using year of first suspension**

| Variable name                   |                                   | Coefficient (bivariate)         | Coefficient (multivariable)  |
|---------------------------------|-----------------------------------|---------------------------------|------------------------------|
| School year of first suspension | No Suspension                     | -                               |                              |
|                                 | 2014-2015                         | -1.36 (-1.40 to -1.31, p<0.001) | -0.88 (-0.94--0.82, p<0.001) |
|                                 | 2015-2016                         | -1.27 (-1.33 to -1.21, p<0.001) | -0.84 (-0.92--0.76, p<0.001) |
|                                 | 2016-2017                         | -1.12 (-1.18 to -1.06, p<0.001) | -0.71 (-0.79--0.63, p<0.001) |
| Age                             |                                   | -0.08 (-0.09 to -0.08, p<0.001) | -0.08 (-0.09--0.08, p<0.001) |
| Race/ethnicity                  | White ( <i>reference</i> )        | -                               | -                            |
|                                 | African American                  | -1.06 (-1.10 to -1.03, p<0.001) | -0.71 (-0.76--0.66, p<0.001) |
|                                 | American Indian or Alaskan Native | -0.68 (-0.80 to -0.57, p<0.001) | -0.54 (-0.70--0.39, p<0.001) |
|                                 | Asian Indian                      | -0.13 (-0.18 to -0.08, p<0.001) | -0.03 (-0.10-0.04, p=0.216)  |
|                                 | East Asian                        | 0.11 (0.08 to 0.13, p<0.001)    | 0.21 (0.17-0.25, p<0.001)    |
|                                 | Hispanic or Latino                | -0.81 (-0.84 to -0.78, p<0.001) | -0.59 (-0.63--0.55, p<0.001) |
|                                 | Other Asian                       | -0.11 (-0.23 to 0.00, p=0.053)  | 0.02 (-0.15-0.18, p=0.419)   |
|                                 | Pacific Islander                  | -0.33 (-0.37 to -0.29, p<0.001) | -0.19 (-0.25--0.14, p<0.001) |

|                                         |                                          |                                 |                              |
|-----------------------------------------|------------------------------------------|---------------------------------|------------------------------|
|                                         | Southeast Asian                          | 0.04 (-0.00 to 0.09, p=0.057)   | 0.15 (0.08-0.21, p<0.001)    |
|                                         | Two or More Races                        | -0.26 (-0.32 to -0.20, p<0.001) | -0.15 (-0.23--0.07, p<0.001) |
|                                         | Unknown                                  | -0.05 (-0.09 to -0.01, p=0.013) | 0.00 (-0.05-0.06, p=0.478)   |
| Gender (self-identified)                | Female                                   | -                               | -                            |
|                                         | Male                                     | -0.33 (-0.34 to -0.31, p<0.001) | -0.25 (-0.27--0.23, p<0.001) |
| Maternal highest education              | Graduate school/postgraduate training    | -                               | -                            |
|                                         | College graduate                         | -0.16 (-0.21 to -0.12, p<0.001) | -0.12 (-0.18--0.06, p<0.001) |
|                                         | Some college (includes associate degree) | -0.54 (-0.59 to -0.50, p<0.001) | -0.29 (-0.35--0.23, p<0.001) |
|                                         | High school graduate                     | -0.55 (-0.59 to -0.50, p<0.001) | -0.33 (-0.38--0.27, p<0.001) |
|                                         | Not a high school graduate               | -0.64 (-0.69 to -0.60, p<0.001) | -0.41 (-0.47--0.35, p<0.001) |
|                                         | Decline to state                         | -0.67 (-0.72 to -0.63, p<0.001) | -0.34 (-0.40--0.29, p<0.001) |
| Active IEP indicating special education | No                                       | -                               | -                            |
|                                         | Yes                                      | -0.60 (-0.62 to -0.58, p<0.001) | -0.19 (-0.21--0.16, p<0.001) |
| School Year                             | 2014-15                                  | -                               | -                            |
|                                         | 2015-16                                  | -0.03 (-0.05 to -0.01, p=0.008) | 0.05 (0.03-0.06, p<0.001)    |

|  |         |                                      |                                |
|--|---------|--------------------------------------|--------------------------------|
|  | 2016-17 | -0.07 (-0.08 to -0.05, $p < 0.001$ ) | 0.08 (0.06-0.10, $p < 0.001$ ) |
|--|---------|--------------------------------------|--------------------------------|
