# Supplementary material for: Exclusionary School Discipline and School Achievement for Middle and High School Students, by Race and Ethnicity
Source: PubMed Central journal article supplement (PMC10589805; doi:10.1001/jamanetworkopen.2023.38989), 2023-10-20
Supplement: jamanetwopen-e2338989-s002.pdf [file jamanetwopen-e2338989-s002.pdf]

## Data Sharing Statement

Cribb Fabersunne. Exclusionary School Discipline and School Achievement for Middle and High School Students, by Race and Ethnicity. *JAMA Netw Open*. Published October 20, 2023. doi:10.1001/jamanetworkopen.2023.38989

### Data

**Data available:** No
